# Supplementary material for: Dynamic phases and combing effects for elongated particles moving over quenched disorder
Source: Royal Society of Chemistry journal article supplement (doi:10.1039/d3sm01034a), 2023-01-01
Supplement: d3sm01034a7.pdf [file d3sm01034a7.pdf]

## Supplemental information for “Dynamic Phases and Combing Effects for Elongated Particles Moving Over Quenched Disorder”

A. Libál<sup>a</sup>, S. Stepanov<sup>b</sup>, C. Reichhardt<sup>c</sup>, and C. J. O. Reichhardt<sup>c</sup>

<sup>a</sup> *Mathematics and Computer Science Department,*

*Babeş-Bolyai University, Cluj-Napoca 400084, Romania*

<sup>b</sup> *Physics Department, Babeş-Bolyai University, Cluj-Napoca 400084, Romania*

<sup>c</sup> *Theoretical Division and Center for Nonlinear Studies,*

*Los Alamos National Laboratory, Los Alamos, New Mexico 87545, USA*

In the Supplemental Figure we illustrate the time behavior of  $C_L$ ,  $S$ , and  $\Delta y$  for a sample with  $n = 5$ ,  $F_D = 0.05$ , and  $N_p = 50$ .

## FIGURES

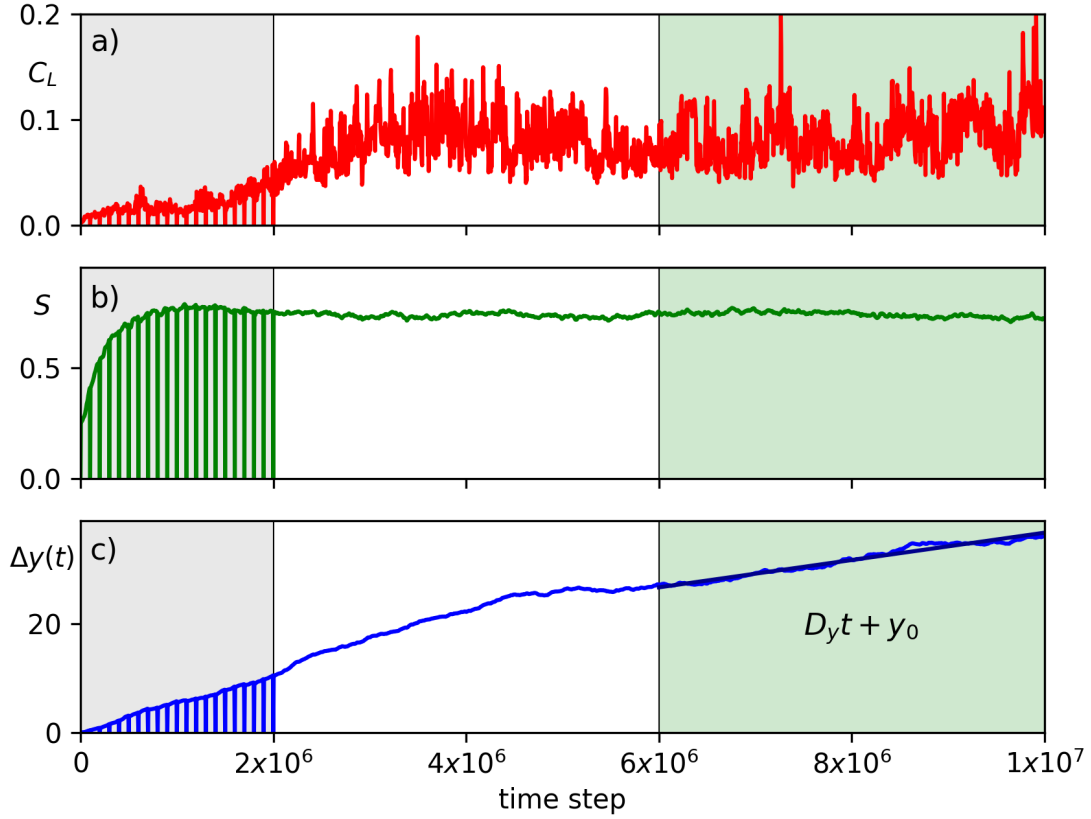

FIG. 1. The time behavior of (a)  $C_L$ , (b)  $S$ , and (c)  $\Delta y$  for a sample with  $n = 5$ ,  $F_D = 0.05$ , and  $N_p = 50$ . In the gray region for times less than  $2 \times 10^6$  simulation time steps, the sample is being initialized and additional particles are being added at intervals marked by the vertical bars in each quantity. In the white region for times between  $2 \times 10^6$  and  $6 \times 10^6$  simulation time steps, the system is allowed to reach a steady state. In the green region for times larger than  $6 \times 10^6$ , we perform measurements of the system.
